# Supplementary material
Source: PubMed Central journal article supplement (PMC4872867)
Supplement: NIHMS784686-supplement-Graphical_Abstract.pdf [file NIHMS784686-supplement-Graphical_Abstract.pdf]

## Graphical Abstract

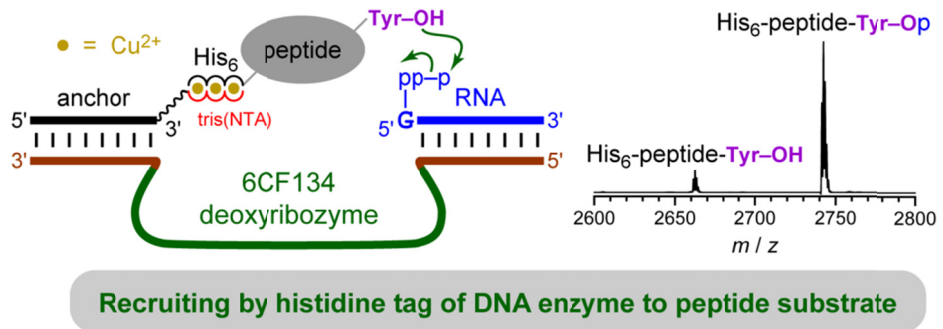

We evaluate the ability of hexahistidine tags to recruit deoxyribozymes for covalently modifying peptides and proteins.
