# Supplementary material
Source: PubMed Central journal article supplement (PMC4872867)
Supplement: NIHMS784686-supplement-Supplementary_Information_1.pdf [file NIHMS784686-supplement-Supplementary_Information_1.pdf]

## Assessing histidine tags for directing deoxyribozyme-catalyzed peptide and protein modification reactions

Chih-Chi Chu and Scott K. Silverman\*

Department of Chemistry, University of Illinois at Urbana-Champaign, 600 South Mathews Avenue,  
Urbana, Illinois 61801, USA

### Table of Contents

|                                                                                  |         |
|----------------------------------------------------------------------------------|---------|
| Oligonucleotides and oligonucleotide-tris(NTA) conjugates.....                   | page S2 |
| Assessing histidine tag recruiting for 8XJ105 with 5'-tris(NTA) DNA anchor ..... | page S2 |
| SDS-PAGE assays of 8XJ105 with protein substrates.....                           | page S3 |
| Trypsin/MALDI mass spectrometry assays of 6CF134 with protein substrates.....    | page S3 |
| Mass spectra of tris(NTA)-modified DNA oligonucleotides .....                    | page S3 |

Oligonucleotides and oligonucleotide-tris(NTA) conjugates*Sequences of oligonucleotides for DNA-catalyzed peptide-RNA conjugation*

| oligonucleotide purpose                      | oligonucleotide sequence, 5' to 3'                                                   |
|----------------------------------------------|--------------------------------------------------------------------------------------|
| 8XJ105 deoxyribozyme <sup>a</sup>            | CCCGAAAGCCTCCTTC <u>GGGAGATGTCTCTCAGACGGAAACTTTCAGTACGGAATGG</u><br>ATACGCATAAAGGTAG |
| 3'-tris(NTA) anchor DNA <sup>b</sup>         | CTACCTTTATGCGTAT-HEG-XXX                                                             |
| 5'-tris(NTA) anchor DNA <sup>c</sup>         | XXXXXXXXXXXXXXXXXXXXTACCTTTATGCGTAT                                                  |
| control anchor DNA                           | AACAACAACAACAACAACAACGGACTACCTTTATGCGTAT                                             |
| 5'-pppRNA substrate                          | ppp-r (GGAAGGAGGCUUUCGGG)                                                            |
| decoy oligo for assay of 8XJ105 <sup>d</sup> | TTATGCGTAT <u>CCATTCCGTA</u> CTGAAAGTTTCCGCTCTGAGAGACATCTCCC<br>GAAGGAGGCT           |

*Sequences of oligonucleotides for DNA-catalyzed tyrosine phosphorylation*

| oligonucleotide purpose              | oligonucleotide sequence, 5' to 3'                                       |
|--------------------------------------|--------------------------------------------------------------------------|
| 6CF134 deoxyribozyme <sup>e</sup>    | GAAGCGCTAGAACAT <u>GGGGACAGGCAGCTCCACCGATGGGCACCG</u><br>ATAGTGAGTCGTATT |
| 3'-tris(NTA) anchor DNA <sup>b</sup> | TAATACGACTCACTAT-HEG-XXX                                                 |
| control anchor DNA                   | GGATAATACGACTCACTAT                                                      |
| 5'-pppRNA substrate                  | ppp-r (GAUGUUCUAGCGCUUCG)                                                |

**Table S1.** Oligonucleotides used during the experiments. All sequences are written 5' to 3' and are DNA unless explicitly indicated as RNA.<sup>a</sup> The underlined nucleotides are the initially random (N<sub>40</sub>) region of 8XJ105. The non-underlined nucleotides are the binding arms.<sup>b</sup> "HEG" is the hexa(ethylene glycol) spacer provided as Spacer 18 (Glen Research). X is the Uni-Link Amino Modifier (Clontech).<sup>c</sup> X is the Uni-Link Amino Modifier (Clontech). See Fig. 2A for structure of this modifier after conversion to tris(NTA) derivative.<sup>d</sup> The underlined nucleotides are complementary to the initially random (N<sub>40</sub>) region of 8XJ105. The non-underlined nucleotides are complementary to the flanking sequences of the binding arms.<sup>e</sup> The underlined nucleotides are the initially random (N<sub>30</sub>) region of 6CF134. The non-underlined nucleotides are the binding arms.Assessing histidine tag recruiting for 8XJ105 with 5'-tris(NTA) DNA anchor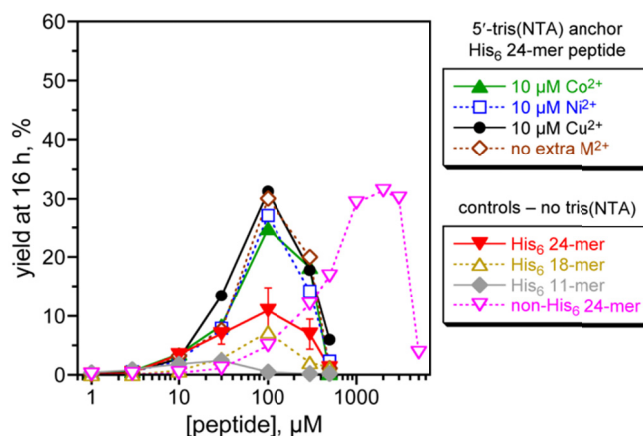**Figure S1.** Data analogous to that in Fig. 3A, here for the 5'-tris(NTA) anchor oligonucleotide.
